# Supplementary material for: Photoprotective Effects of Selected Amino Acids on Naproxen Photodegradation in Aqueous Media
Source: MDPI journal article supplement (doi:10.3390/ph13060135), 2020-06-26
Supplement: s1 [file s1]

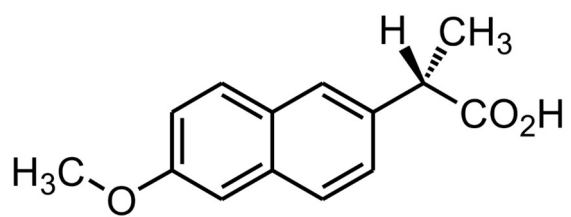

**Figure S1.** Chemical structure of NX
